# Supplementary material
Source: PubMed Central journal article supplement (PMC3409768)
Supplement: 1209954109_sapp.pdf [file 1209954109_sapp.pdf]

# Supporting Information Appendix

## Insights into Salt Tolerance from the Genome of *Theillungiella salsuginea*

Hua-Jun Wu<sup>1\*</sup>, Zhonghui Zhang<sup>1\*</sup>, Jun-Yi Wang<sup>2\*</sup>, Dong-Ha Oh<sup>4\*</sup>, Maheshi Dassanayake<sup>4\*</sup>, Binghang Liu<sup>2\*</sup>, Quanfei Huang<sup>2\*</sup>, Hai-Xi Sun<sup>1</sup>, Ran Xia<sup>1</sup>, Yaorong Wu<sup>1</sup>, Yinan Wang<sup>1</sup>, Zhao Yang<sup>1</sup>, Yang Liu<sup>1</sup>, Wanke Zhang<sup>1</sup>, Huawei Zhang<sup>1</sup>, Jinfang Chu<sup>1</sup>, Cunyu Yan<sup>1</sup>, Shuang Fang<sup>1</sup>, Jinsong Zhang<sup>1</sup>, Yiqin Wang<sup>1</sup>, Fengxia Zhang<sup>1</sup>, Guodong Wang<sup>1</sup>, Sang Yeol Lee<sup>5</sup>, John M Cheeseman<sup>4</sup>, Bicheng Yang<sup>2</sup>, Bo Li<sup>2</sup>, Jiumeng Min<sup>2</sup>, Linfeng Yang<sup>2</sup>, Jun Wang<sup>2,†</sup>, Chengcai Chu<sup>1,†</sup>, Shou-Yi Chen<sup>1,†</sup>, Hans J Bohnert<sup>4,5</sup>, Jian-kang Zhu<sup>3,†</sup>, Xiu-Jie Wang<sup>1,†</sup> and Qi Xie<sup>1,†</sup>

<sup>1</sup> State Key Laboratory of Plant Genomics, National Center for Plant Gene Research (Beijing), Institute of Genetics and Developmental Biology, Chinese Academy of Sciences, Datun Road, Beijing 100101, China

<sup>2</sup> BGI-Shenzhen, Beishan Industrial Zone, Yantian District, Shenzhen 518083, China

<sup>3</sup> Department of Horticulture & Landscape Architecture, Purdue University, West Lafayette, Indiana 47907, USA

<sup>4</sup> Department of Plant Biology, University of Illinois at Urbana-Champaign, Urbana, IL 61801, USA

<sup>5</sup> Division of Applied Life Sciences, Gyeongsang National University, Jinju 660-701, Korea

<sup>6</sup> College of Science, King Abdulaziz University, Jeddah 21589, Saudi Arabia

\* These authors contributed equally to this work.

† Corresponding authors

To whom correspondence should be addressed: E-mail: [qxie@genetics.ac.cn](mailto:qxie@genetics.ac.cn) or [xjwang@genetics.ac.cn](mailto:xjwang@genetics.ac.cn) or [zhu132@purdue.edu](mailto:zhu132@purdue.edu)

FAX: 86-10-64889351; 86-10-64860941

## Table of Contents

|                                                                                                                    |    |
|--------------------------------------------------------------------------------------------------------------------|----|
| Supporting Materials and Methods .....                                                                             | 3  |
| Assembly accuracy.....                                                                                             | 3  |
| Repeat annotation.....                                                                                             | 3  |
| Gene prediction and annotation .....                                                                               | 3  |
| Gene family analysis .....                                                                                         | 4  |
| Identification of segmental and tandem duplications .....                                                          | 4  |
| LTR retrotransposon carrying genes and retrogenes.....                                                             | 5  |
| Phylogenetic tree construction and species divergent time estimation.....                                          | 5  |
| Quantification of TsHKT1 transcripts with real time reverse transcription- polymerase chain reaction (RT-PCR)..... | 5  |
| References.....                                                                                                    | 7  |
| Supporting Figures.....                                                                                            | 8  |
| Supporting Tables.....                                                                                             | 15 |

## Supporting Materials and Methods

### Assembly accuracy

The accuracy of the assembled genome was confirmed using available ESTs and BAC sequences. Nearly 98% of all ESTs showed exact sequence matches with the assembled genome over at least 50% of their entire length. Four BAC sequences from NCBI and two from BGI showed 95% coverage and greater than 99.9% accuracy of low repeat regions.

### Repeat annotation

Known TEs were identified using RepeatMasker (version 3.3.0) to search against the Repbase TE library (version 15.11) (1). TEdenovo pipeline included in the REPET (2) package was used for identifying novel repetitive sequences. Default parameters were used except for “minNbSeqPerGroup: 5”. The resultant *de novo* output identified consensus TEs, excluding sequences classified as “NoCat”, was used as the reference repeats library in a second RepeatMasker run to identify and mask novel repetitive sequences in the *T. salsuginea* genome.

### Gene prediction and annotation

Protein coding gene models were identified by FGENESH++ pipeline (Softberry Inc., Mount Kisco, NY) with parameters trained with *A. thaliana* gene models. Genome sequences masked by RepeatMasker using RepBase and the *de novo* reference TE library as described in Repeat annotation section were used as input. To facilitate the gene prediction with transcriptome evidence, a *T. salsuginea* reference transcriptome was assembled from Illumina RNA-seq reads using Abyss and Vmatch (<http://www.vmatch.de/>). Known *T. salsuginea* ESTs and full-length cDNA sequences from NCBI database were added to the reference transcriptome. *De novo* predicted gene models were corrected based on comparison to all known plant protein sequences from the NCBI NR database. The reference transcriptome was aligned to the genome sequence and used to identify the borders of exons and untranslated regions (UTRs) for gene models with transcriptome evidence. Open reading frame (ORF) sequences less than 150 nucleotides were filtered out. The nucleotide ORF and protein sequences were annotated based on sequence homology to known sequences, using BlastN and

BlastP (E-value  $\leq 1e-5$ ) to search against the NCBI nt and nr databases (<ftp://ftp.ncbi.nih.gov/blast/db/>), respectively. The Blast2GO pipeline was used for Gene Ontology annotation, with the incorporation of InterProScan and KEGG pathway search results (3).

### **Gene family analysis**

We used a best hit strategy for systemic identification of gene copy number variations in gene families in *T. salsuginea*. All *T. salsuginea* genes were subjected to BlastP search (E-value  $\leq 1e-5$ ) against all *A. thaliana* genes. The best hit to each *T. salsuginea* gene were picked up and considered as its most close orthologous gene in *A. thaliana*. A gene relationship table was generated based on the best hit strategy and was then used to calculate the gene copy number variations in each collected family. Transcription factor gene families in *A. thaliana* were downloaded from PlantTFDB (4), and stress related gene families in *A. thaliana* were manually collected from published records. Gene family member variations in other species were performed similarly. For comparison of gene models with *A. thaliana* and *T. parvula*, protein-coding gene models in TAIR10 ([www.arabidopsis.org](http://www.arabidopsis.org)) and the version 2.0 annotation of *T. parvula* ([www.thellungiella.org](http://www.thellungiella.org)) were used. Gene models were clustered using OrthoMCL. Orthologous gene pairs were defined as sharing deduced amino acid sequence homology (BlastP, E-value  $< 1e-5$ ) over 50% of the total length of the shorter gene being compared.

### **Identification of segmental and tandem duplications**

To identify segmental duplications, we first performed self BlastP (-v 5 -b 5 -e 1e-10) using the deduced protein sequences of the *T. salsuginea* and *A. thaliana* genomes. A Perl script provided by DAGchainer was used to remove the repetitive matches (5). This was done by clustering all groups of matched genes that fall within 50 kb of each other and reporting only the single highest scoring match in each region. Segmental duplicated blocks were then identified using DAGchainer with optimized parameters (-s -I -D 200000 -g 10000 for *A. thaliana*; -s -I -D 500000 -g 25000 for *T. salsuginea* because of the large number of transposon insertions). To identify tandem duplications, we performed self BlastP using protein sequences with the parameters -v 100 -b 100 -e 1e-5. All genes were grouped with the following parameters: identity  $\geq 70\%$ ; coverage  $\geq 30\%$ . Homologous genes within the same group and with fewer than five genes in between were identified

as tandem duplicated gene pairs.

### **LTR retrotransposon carrying genes and retrogenes**

We used a similar method to that described by Jiang *et al.* (6) to perform systemic identification of LTR retrotransposons carrying genes and retrogenes. Full-length LTR retrotransposons were identified by using LTR\_FINDER (7) with parameters -S 5 -C, which will contain at least 5 of 11 typical structural or sequence features of LTR retrotransposons. Protein coding genes entirely located within these LTR retrotransposons were considered as LTR (retrotransposon) carrying genes. To find retrogenes, we performed BlastP using the single-exon protein sequences as query, multiple-exon protein sequences as database and used the cutoff of identity  $\geq 70\%$ , query coverage  $\geq 70\%$  and E value  $< 1e-8$  to select retrogenes.

### **Phylogenetic tree construction and species divergent time estimation**

The phylogenetic tree of the *T. salsuginea* and the other plant genomes was constructed using the 2226 single-copy orthologous genes and 4-fold degenerate sites (4dTv) method. The divergence time between *T. salsuginea* and *A. thaliana* was estimated by the MULTIDIVTIME program.

### **Quantification of TsHKT1 transcripts with real time reverse transcription polymerase chain reaction (RT-PCR)**

RNA samples from *A. thaliana* and *T. salsuginea* seedlings with and without salt stress were prepared essentially as described by Oh *et al.* (8). To deduce absolute copy numbers of transcripts per  $\mu\text{g}$  total RNA samples, calibration curves were generated by performing real time PCR using 7900 HT Fast Real-Time PCR system (Applied Biosystems, Carlsbad, CA) with serial dilutions of known amount of recombinant plasmid DNA molecules that contain the template sequences (9). The recombinant plasmids were prepared by cloning RT-PCR products amplified by the following primers into the pGemTeasy vector (Promega, Madison, WI):

AtHKT1 223F GAAGTCTTCTCCAACACCCAACCTT

AtHKT1 823R TACTTGAGGGATTAGGAGCCAGA

TsHKT1;1 44F TTGCTAAAAATCCTTCCGTCCTCT

TsHKT1;1 770R CCCGAAACGAGAAACAATAAAAAGC

TsHKT1;2 409F AATCATGTCAAGCTTTCTAGTCAG

TsHKT1;2 1152R TCCTTTAATTCATCTCCGGAATCGTGT

TsHKT1;3 424F GATCATGTCAAGATTCTAGTCAGA

TsHKT1;3 1181R AAATCCACTTTTCTTTCCCTTCTTTTCATTTC

Real time RT-PCR was performed using primers that are specific to each of the *A. thaliana* and *T. salsuginea* *HKT1* gene homologs. From the real time RT-PCR results and the calibration curves, the absolute transcript copy numbers were calculated as described by Pfaffl (9). Primer sequences are listed below:

AtHKT1 476F CGGTGGTTCTTAGTTACCATCTT

AtHKT1 594R GAGAGGTGAGATTTCTTTGGAAC

TsHKT1;1 195F GTCTCCTCCATGTCCACCATCG

TsHKT1;1 305R AGAGTGTGAGGAATGAAGTAAAGACCTCG

TsHKT1;2 782F CAAATCGAGAAGAATTGGGTACATTCT

TsHKT1;2 903R GCAGAATAGAAGAACTGTATCATCACAAGC

TsHKT1;3 785F CAAAGCGCGACGAATTTGGTTATATTC

TsHKT1;3 928R GCAGAAGAGAAGAACTGTATCATCACAAC

## References

1. Jurka J, *et al.* (2005) Repbase Update, a database of eukaryotic repetitive elements. *Cytogenet Genome Res* 110:462-467.
2. Flutre T, Duprat E, Feuillet C, & Quesneville H (2011) Considering transposable element diversification in de novo annotation approaches. *PLoS One* 6:e16526.
3. Gotz S, *et al.* (2008) High-throughput functional annotation and data mining with the Blast2GO suite. *Nucleic Acids Res* 36:3420-3435.
4. Zhang H, *et al.* (2011) PlantTFDB 2.0: update and improvement of the comprehensive plant transcription factor database. *Nucleic Acids Res* 39:D1114-1117.
5. Haas BJ, Delcher AL, Wortman JR, & Salzberg SL (2004) DAGchainer: a tool for mining segmental genome duplications and synteny. *Bioinformatics* 20:3643-3646.
6. Jiang SY, Christoffels A, Ramamoorthy R, & Ramachandran S (2009) Expansion mechanisms and functional annotations of hypothetical genes in the rice genome. *Plant Physiol* 150:1997-2008.
7. Xu Z & Wang H (2007) LTR\_FINDER: an efficient tool for the prediction of full-length LTR retrotransposons. *Nucleic Acids Res* 35:W265-268.
8. Oh DH, *et al.* (2009) Loss of halophytism by interference with SOS1 expression. *Plant Physiol* 151:210-222.
9. Pfaffl MW (2001) A new mathematical model for relative quantification in real-time RT-PCR. *Nucleic Acids Res* 29:e45.

## Supporting Figures

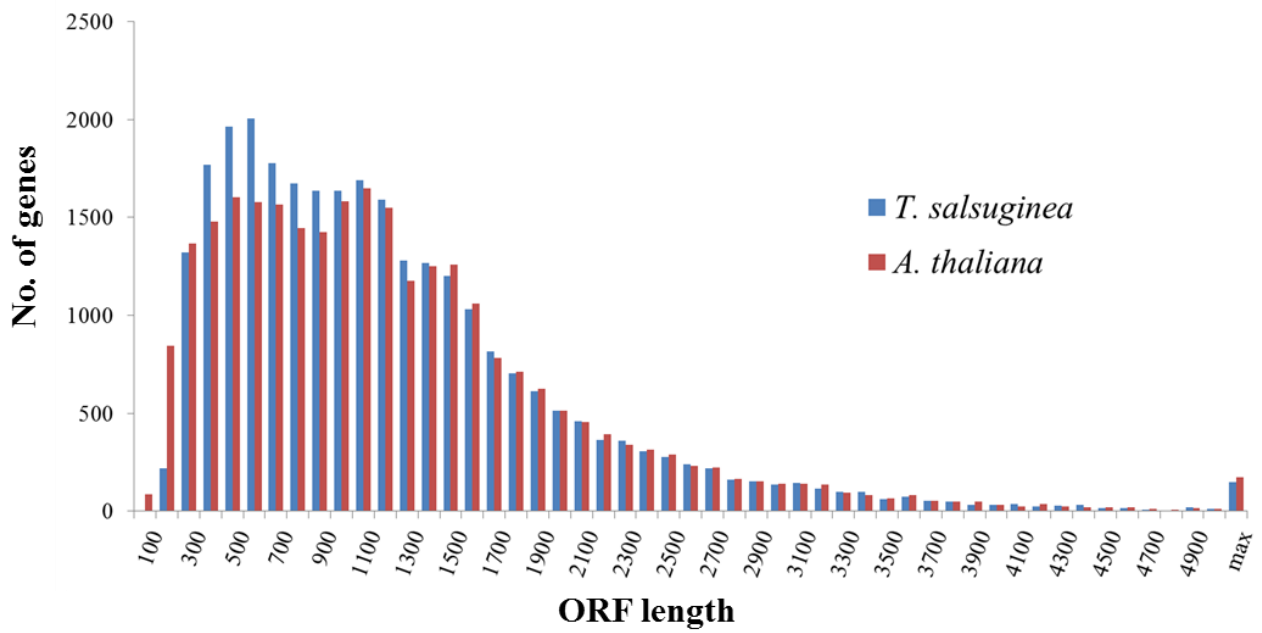

Fig. S1. ORF length distribution comparison between *T. salsuginea* and *A. thaliana*.



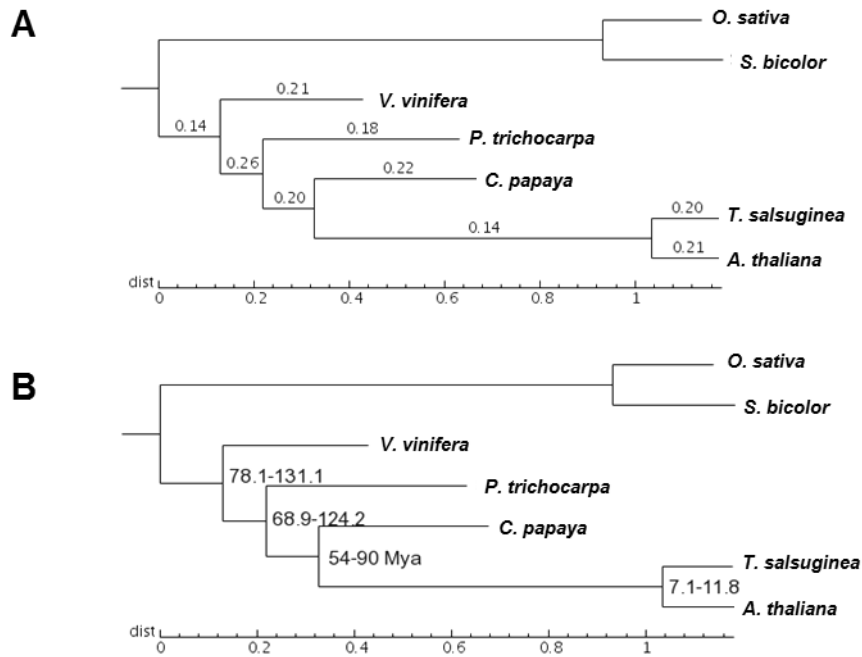

**Fig. S2. Phylogenetic tree and estimation of species divergent time.**

A. Phylogenetic tree of selected plant species constructed with 2226 single-copy gene families on 4-fold degenerate sites. The branch length represents the neutral divergence rate. Numbers shown on the branches represent the dN/dS rate of each branch. The posterior probabilities (credibility of the topology) for inner nodes are all 100%.

B. Estimation of divergent time. The numbers on the nodes identify the divergent time from the present (million years ago, Mya). The calibration time (fossil record time) interval (54-90 Mya) for Capparales was taken from published reports (Wikström, 2001; Crepet, 2004).

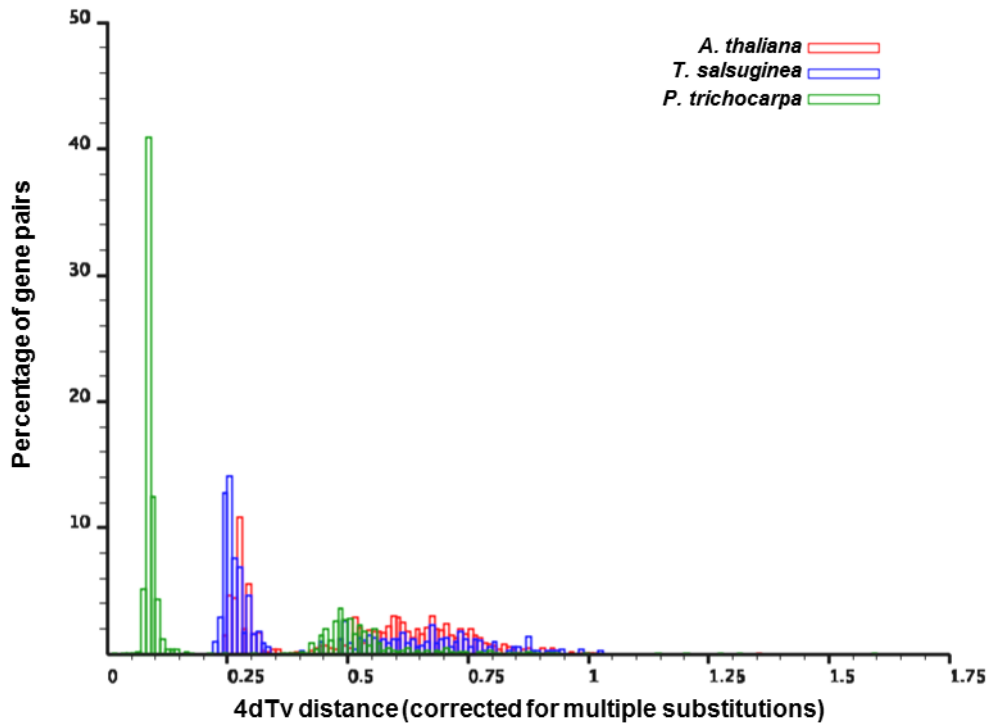

**Fig. S3. 4dTv distance distribution for *T. salsuginea*, *A. thaliana* and *P. trichocarpa*.**

The intra-genomic syntenic blocks among *T. salsuginea*, *A. thaliana*, and *P. trichocarpa* were detected using Mcscan program. The intervening gene number cutoffs in each block are 10 for *T. salsuginea* and *A. thaliana*, and 8 for *P. trichocarpa*, respectively. The 4dTv distances are calculated based on 4-fold degenerate sites following the HKY substitution model.

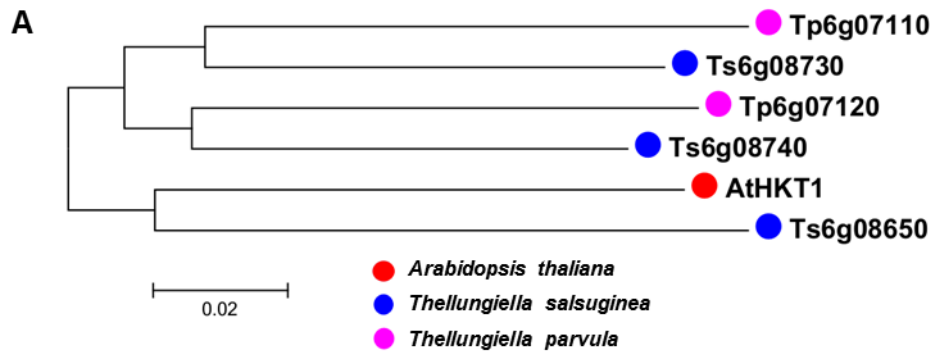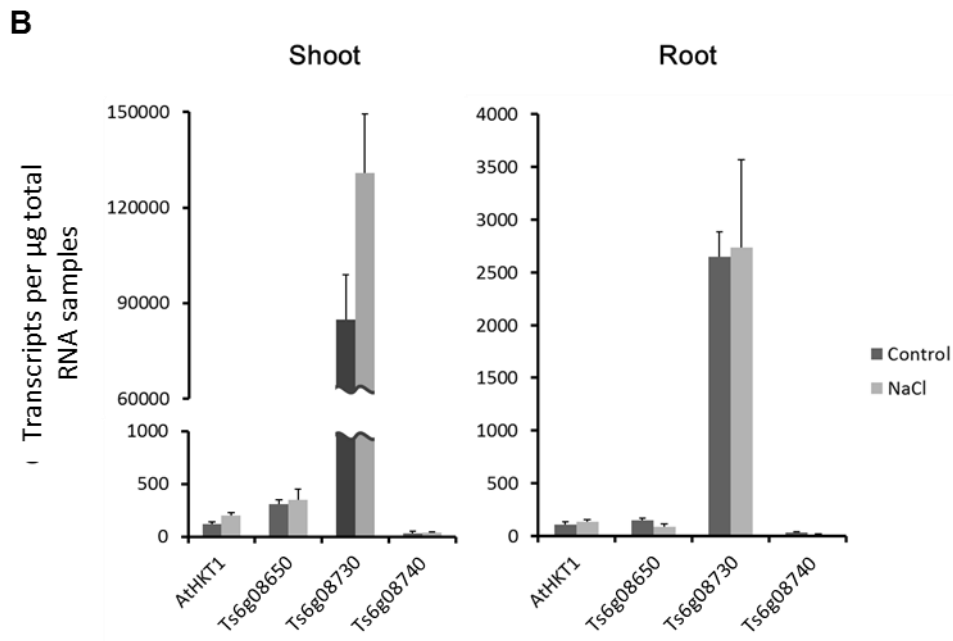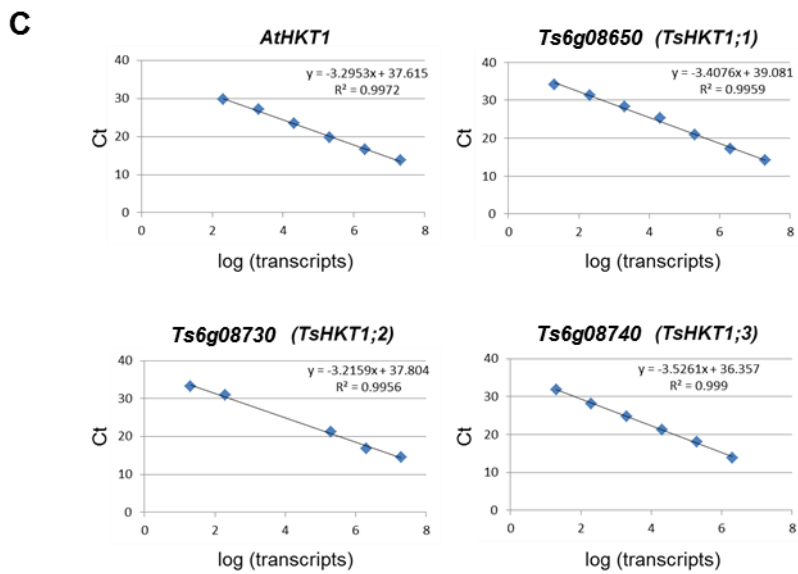

**Fig S4 Phylogenetic and expression analysis of *HKT1* genes.**

A. Phylogenetic analysis of plant *HKT1* genes identifies three gene groups (Class I, II and III).

B. Quantification of transcripts of *HKT1* homologs from *A. thaliana* and *T. salsuginea*. RNA samples from 2 week-old *A. thaliana* and 3 week-old *T. salsuginea* plants treated with 200 mM NaCl for 12 hours were subjected to quantitative real-time RT-PCR as described in *SI Appendix*.

C. Standard calibration curves used for deducing the absolute transcript copy numbers from the real-time RT-PCR results. For detailed methods, see the *SI Appendix* and references therein.

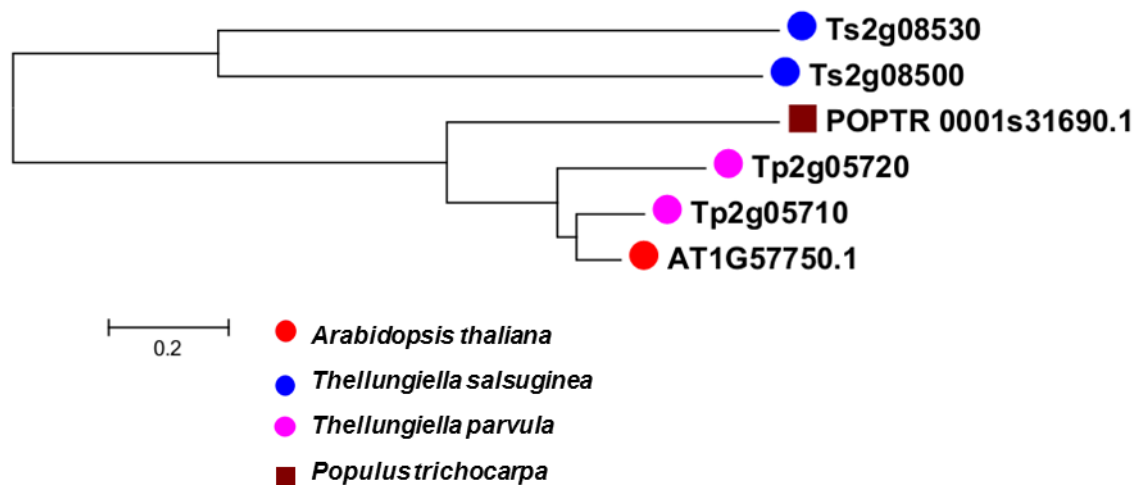

**Fig. S5. Phylogenetic analysis of MAH1/CYP96A15 genes in *T. salsauginea*, *A. thaliana*, *T. parvula*, *P. trichocarpa*.**

The phylogenetic tree was constructed using the Neighbor Joining Method with the Mega 5.0 software. The MAH1/CYP96A15 gene, which belongs to the P450 gene family and functions as a key enzyme in the alkane-forming pathway, is tandem duplicated in both *T. salsauginea* and *T. parvula*. We failed to find the corresponding MAH1 genes in *V. vinifera*, *C. papaya* and *O. sativa*.

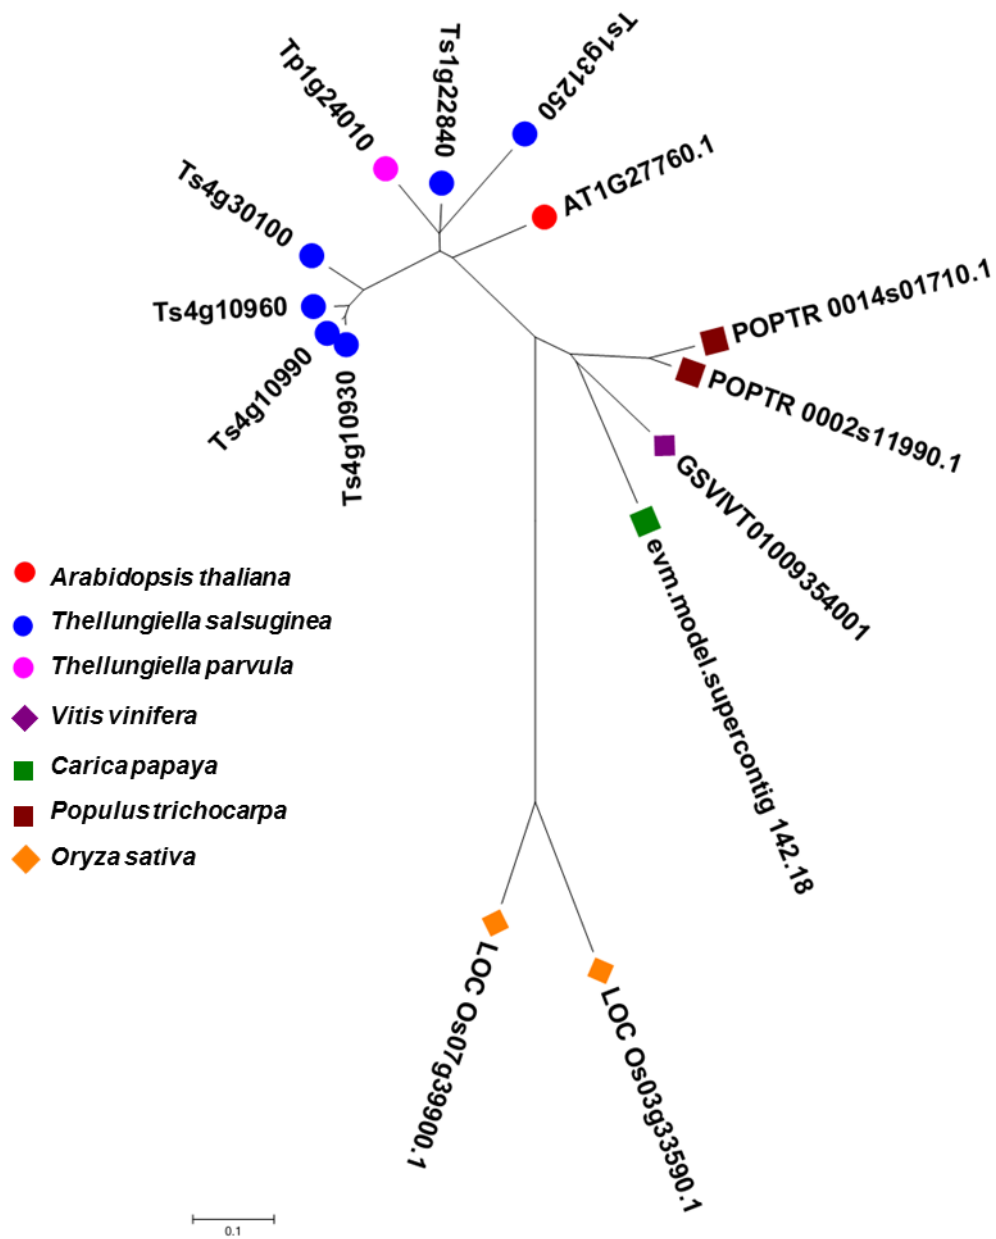

**Fig. S6. Phylogenetic analysis of SAT32 genes in *T. salsuginea*, *A.thaliana*, *T. parvula*, *V. vinifera*, *P. trichocarpa*, *C. papaya*, *O. sativa*.**

The phylogenetic tree was constructed using the Neighbor Joining Method with the Mega 5.0 software.

## Supporting Tables

**Table S1. Features of the *T. salsuginea* genome.**

| Feature                                     | Value                   |
|---------------------------------------------|-------------------------|
| Estimated genome size                       | 260 Mb                  |
| Assembled genome sequence                   | 233,653,061 bp          |
| Length of scaffolds in seven chromosomes    | 186,126,548 bp          |
| Number of scaffolds anchored to chromosomes | 515                     |
| Number of unplaced scaffolds                | 2167                    |
| Length of unplaced scaffolds                | 47,526,513 bp           |
| Total number of scaffolds                   | 2682                    |
| N50                                         | 403,516 bp              |
| Number of scaffolds at least N50            | 119                     |
| Transposable elements (percentage)          | 121,046,173 bp (51.81%) |
| DNA transposons                             | 20,160,164 bp (8.63%)   |
| Retrotransposon                             | 90,570,024 bp (38.76%)  |
| Other                                       | 10,315,985 bp (4.42%)   |
| Number of genes                             | 28,457                  |
| Length of coding regions (percentage)       | 58,138,525 bp (24.88%)  |
| Gene density                                | 122 genes per Mb        |
| Average gene length                         | 2,041 bp                |
| Average protein length                      | 398 aa                  |
| Number of exons (per gene)                  | 149,079 (5.23)          |
| Average exon length                         | 228 bp                  |
| Average intron length                       | 200 bp                  |
| Gene annotation (percentage)                |                         |
| InterPro                                    | 19,920 (69.9%)          |
| GO                                          | 21,859 (76.8%)          |
| With NCBI NR blast hit                      | 26,016 (91.3%)          |
| With ATH blast hit                          | 25,288 (88.8%)          |
| Unannotated                                 | 1,836 (6.45%)           |
| Non-coding RNAs                             |                         |
| miRNA                                       | 162                     |
| tRNA                                        | 447                     |
| rRNA                                        | 11                      |
| snRNA                                       | 432                     |

**Table S2. Summary of the *T. salsuginea* genome sequencing data.** The estimated genome size of 260 Mb is used to calculate the sequencing depth.

| <b>Insert size<br/>(bp)</b> | <b>Average read size<br/>(bp)</b> | <b>No. of<br/>sequencing lanes</b> | <b>No. of usable reads<br/>(Million)</b> | <b>No. of usable bases<br/>(Mb)</b> | <b>Sequencing depth<br/>(fold)</b> |
|-----------------------------|-----------------------------------|------------------------------------|------------------------------------------|-------------------------------------|------------------------------------|
| 180                         | 90                                | 1                                  | 47.90                                    | 4311.56                             | 16.58                              |
| 200                         | 41                                | 3                                  | 98.75                                    | 4048.91                             | 15.57                              |
| 340                         | 60                                | 1                                  | 51.01                                    | 3060.76                             | 11.77                              |
| 374                         | 75                                | 2                                  | 84.65                                    | 6349.08                             | 24.42                              |
| 682                         | 75                                | 2                                  | 65.25                                    | 4893.7                              | 18.82                              |
| 2000                        | 44                                | 3                                  | 93.48                                    | 4113.16                             | 15.82                              |
| 2000                        | 44                                | 1                                  | 20.19                                    | 888.21                              | 3.42                               |
| 5000                        | 44                                | 1                                  | 25.12                                    | 1105.31                             | 4.25                               |
| 5000                        | 44                                | 3                                  | 90.76                                    | 3993.57                             | 15.36                              |
| 10000                       | 44                                | 2                                  | 14.07                                    | 619.24                              | 2.38                               |
| 10000                       | 44                                | 1                                  | 16.83                                    | 740.55                              | 2.85                               |
| 10000                       | 44                                | 1                                  | 15.70                                    | 690.76                              | 2.66                               |
| <b>Total</b>                |                                   | <b>21</b>                          | <b>623.73</b>                            | <b>34814.81</b>                     | <b>133.90</b>                      |



**Table S3. Statistics of repeat sequences in the *T. salsuginea* genome.**

| Identification method | Type of repeats | On seven chromosomes | Unanchored       | All               |
|-----------------------|-----------------|----------------------|------------------|-------------------|
| RepBase               | Retroposon      | 19,017,116           | 9,762,654        | 28,779,770        |
|                       | DNA transposon  | 4,721,481            | 1,065,990        | 5,787,471         |
|                       | Other           | 230,210              | 32,886           | 263,096           |
| TEdenovo              | Retroposon      | 36,353,568           | 25,436,686       | 61,790,254        |
|                       | DNA transposon  | 11,721,545           | 2,651,148        | 14,372,693        |
|                       | Other           | 7,256,637            | 2,796,252        | 10,052,889        |
| Total repeats         |                 | 79,300,557 (43%)     | 41,745,616 (88%) | 121,046,173 (52%) |

**Table S4. Non-coding RNA genes in the assembled genome.**

| Type  |                 | Copy number | Average length(bp) | Total length(bp) |
|-------|-----------------|-------------|--------------------|------------------|
| tRNA  |                 | 447         | 74                 | 33,154           |
| rRNA  |                 | 11          | 508                | 5,588            |
| snRNA | CD-box snoRNA   | 323         | 99                 | 31,919           |
|       | HACA-box snoRNA | 37          | 124                | 4,589            |
|       | splicing        | 72          | 141                | 10,163           |
| miRNA | Conversed       | 126         | 152                | 19,111           |
|       | Novel           | 36          | 118                | 4,252            |

**Table S5. Functional comparison on different types of duplicated genes between *T. salsuginea* and *A. thaliana*.** Blast2GO results of protein coding regions from *T. salsuginea* and *A. thaliana* were mapped to categories in the second level of GO terms. Fisher's exact test was performed to identify the significantly differed GO terms. P-values less than 0.05 and 0.01 are shown with light and dark grey circles, respectively. TD: tandem duplicated genes; SD: segmental duplicated genes; LTR: LTR retrotransposon carrying genes; RETRO: retrogenes.

| Gene category                                      | Total (ATH/TSA)    | TD (ATH/TSA)     | SD (ATH/TSA)     | LTR (ATH/TSA)  | RETRO (ATH/TSA) |
|----------------------------------------------------|--------------------|------------------|------------------|----------------|-----------------|
| biological regulation                              | ● 5655/5368        | 480/495          | 2373/2253        | ● 65/87        | 74/96           |
| carbon utilization                                 | 84/91              | 4/4              | 38/41            | 0/2            | 2/1             |
| cell killing                                       | 11/17              | 6/9              | 2/2              | 0/1            | 0/0             |
| cell proliferation                                 | 41/49              | 0/4              | 19/18            | 0/1            | 1/0             |
| cellular component organization or biogenesis      | ● 1999/2248        | ● 154/202        | ● 819/893        | 21/34          | 27/32           |
| cellular process                                   | ● 10594/11452      | ● 1125/1234      | ● 3885/4093      | 105/196        | 149/196         |
| death                                              | 187/215            | 22/31            | 51/51            | 3/3            | 1/4             |
| developmental process                              | ● 2258/2724        | ● 175/227        | ● 987/1149       | 16/28          | 20/32           |
| establishment of localization                      | 2278/2394          | 224/237          | 898/921          | 15/21          | 18/25           |
| growth                                             | 406/470            | 36/45            | 212/243          | 0/5            | 8/8             |
| immune system process                              | 357/398            | 55/62            | 132/107          | 10/11          | 2/5             |
| localization                                       | 2364/2490          | 231/251          | 935/960          | 16/21          | 18/27           |
| locomotion                                         | 17/28              | 3/6              | 6/13             | 2/0            | 0/0             |
| metabolic process                                  | ● 9670/10308       | 1308/1269        | ● 3230/3436      | 92/190         | 138/175         |
| multi-organism process                             | 1135/1274          | 193/188          | 454/484          | ● 24/21        | 9/12            |
| multicellular organismal process                   | ● 2186/2677        | ● 175/242        | ● 926/1094       | 18/31          | 17/33           |
| negative regulation of biological process          | ● 431/522          | ● 18/39          | 198/191          | 3/7            | 5/13            |
| pigmentation                                       | 7/7                | 0/0              | 5/5              | 0/0            | 0/0             |
| positive regulation of biological process          | 461/480            | 32/42            | 213/200          | 4/13           | 3/8             |
| regulation of biological process                   | 4778/5065          | ● 386/464        | ● 2034/2130      | 55/84          | 64/95           |
| reproduction                                       | ● 1230/1490        | ● 91/155         | ● 497/577        | 8/15           | 8/16            |
| reproductive process                               | ● 1202/1463        | ● 88/149         | ● 489/567        | 7/15           | 8/16            |
| response to stimulus                               | ● 5412/6049        | ● 737/813        | ● 2208/2417      | 63/91          | 93/134          |
| rhythmic process                                   | ● 61/101           | ● 0/6            | 39/56            | 0/0            | 0/0             |
| signaling                                          | 1713/1737          | 201/208          | ● 694/747        | ● 33/32        | 36/38           |
| viral reproduction                                 | 11/22              | 3/0              | 5/11             | 2/0            | 0/0             |
| cell                                               | ● 17451/16118      | ● 1960/1624      | 6020/5822        | ● 232/242      | ● 252/258       |
| cell junction                                      | 24/28              | 0/0              | 16/16            | 0/0            | 0/0             |
| extracellular region                               | 654/637            | ● 141/108        | 247/277          | 7/8            | 14/14           |
| extracellular region part                          | 53/73              | 9/5              | ● 25/43          | 1/0            | 0/1             |
| macromolecular complex                             | ● 4393/4382        | 278/312          | 1900/1826        | ● 41/47        | ● 64/70         |
| membrane-enclosed lumen                            | 2579/2556          | 175/191          | 1239/1160        | 27/33          | 36/36           |
| organelle                                          | 10496/10750        | ● 833/931        | ● 3823/3837      | 104/160        | 123/172         |
| sympplast                                          | 17/18              | 0/0              | 11/10            | 0/0            | 0/0             |
| virion                                             | ● 15/3             | 0/0              | 4/3              | 0/0            | 0/0             |
| antioxidant activity                               | 162/155            | 28/20            | 55/56            | 1/1            | 1/1             |
| binding                                            | ● 12951/13785      | ● 1359/1478      | ● 4396/4718      | ● 130/312      | 171/246         |
| catalytic activity                                 | 9228/9703          | 1273/1289        | ● 3052/3221      | 95/193         | 108/173         |
| channel regulator activity                         | 7/6                | 2/4              | 0/0              | 0/0            | 0/0             |
| electron carrier activity                          | 547/535            | 146/124          | 175/156          | 4/17           | 8/24            |
| enzyme regulator activity                          | 380/375            | 28/35            | 171/157          | 3/7            | 1/1             |
| metallochaperone activity                          | 4/3                | 0/0              | 2/0              | 0/0            | 0/0             |
| molecular transducer activity                      | 419/429            | 50/52            | 163/161          | 3/5            | 3/3             |
| nucleic acid binding transcription factor activity | ● 1734/1669        | 108/118          | 87/840           | 14/19          | 17/22           |
| nutrient reservoir activity                        | 67/56              | 28/20            | 19/24            | 3/1            | 0/0             |
| protein binding transcription factor activity      | 61/66              | 2/4              | 18/22            | 0/0            | 1/1             |
| protein tag                                        | 5/4                | 1/2              | 2/3              | 0/0            | 0/0             |
| receptor activity                                  | 294/344            | 30/47            | 116/136          | 3/1            | 3/2             |
| structural molecule activity                       | 567/545            | 43/35            | 245/222          | ● 9/5          | 2/8             |
| translation regulator activity                     | 3/3                | 0/0              | 0/0              | 0/0            | 0/0             |
| transporter activity                               | 1347/1405          | 167/167          | 512/524          | 9/11           | 11/22           |
| <b>Total genes</b>                                 | <b>27416/28457</b> | <b>2708/2723</b> | <b>8429/8178</b> | <b>444/842</b> | <b>353/535</b>  |

**Table S6. Comparison of transcription factor gene families between *T. salsuginea*, *T. parvula* and *A. thaliana*.**

| Gene Family | No. of genes         |                   |                    |
|-------------|----------------------|-------------------|--------------------|
|             | <i>T. salsuginea</i> | <i>T. parvula</i> | <i>A. thaliana</i> |
| RAV         | 9                    | 6                 | 6                  |
| NF-X1       | 3                    | 2                 | 2                  |
| EIL         | 9                    | 8                 | 6                  |
| LSD         | 4                    | 4                 | 3                  |
| ARR-B       | 18                   | 21                | 14                 |
| G2-like     | 53                   | 47                | 42                 |
| Nin-like    | 17                   | 14                | 14                 |
| GRAS        | 40                   | 35                | 33                 |
| HSF         | 28                   | 23                | 24                 |
| CAMTA       | 7                    | 6                 | 6                  |
| E2F/DP      | 9                    | 9                 | 8                  |
| CPP         | 9                    | 6                 | 8                  |
| GRF         | 10                   | 10                | 9                  |
| AP2         | 20                   | 16                | 18                 |
| B3          | 69                   | 59                | 64                 |
| Trihelix    | 31                   | 29                | 29                 |
| M-type      | 70                   | 52                | 66                 |
| MIKC        | 44                   | 42                | 42                 |
| GATA        | 31                   | 31                | 30                 |
| HD-ZIP      | 49                   | 55                | 48                 |
| bZIP        | 75                   | 76                | 74                 |

Note: the TF data were downloaded from: <http://plantfdb.cbi.pku.edu.cn/index.php?sp=At>.

**RAV Family:** RAV transcription factor were strongly induced after pathogen infection and salt (PMID: 16927203) & RAV transcription factor were induced by cold stress (PMID: 15728337).

**NF-X1 Family:** The AtNFXL1 gene encodes a NF-X1 type zinc finger protein required for growth under salt stress (PMID: 16905136).

**GRAS Family:** involves in plant development regulation. RGL3 transcript levels were transiently increased by cold (PMID: 18757556).

**HSF Family:** heat stress factors. Salt and osmotic stress induced *HsfA2* gene expression, and *HsfA2* overexpression mutant showed enhanced osmotic stress (PMID: 17890230).

**Trihelix Family:** The transcript level of *OsGTγ-1* was strongly induced by salt stress, and overexpression of *OsGTγ-1* in rice enhanced salt tolerance at the seedling stage (PMID: 20039179).

**EIL** : ethylene. **LSD**: PCD. **ARR-B**: cytokinin. **G2-like**: chloroplast development. **Nin-like**: root nodules. **CAMTA**: calmodulin binding TF. **E2F/DP**: cell proliferation. **CPP**: cell division. **GRF**: growth regulation. **AP2**: development. **B3**: includes LAV, REM and RAV family. M-type&MIKC: MADS-box TFs. **GATA**: light responsive. **HD-ZIP**: development.

**Table S7. Species distribution analysis of ionic homeostasis related gene families.**

| Gene Family | No. of genes         |                   |                    |
|-------------|----------------------|-------------------|--------------------|
|             | <i>T. salsuginea</i> | <i>T. parvula</i> | <i>A. thaliana</i> |
| NHX         | 8                    | 11                | 8                  |
| HKT1        | 3                    | 2                 | 1                  |
| Shaker      | 9                    | 9                 | 9                  |
| KEA         | 6                    | 6                 | 6                  |
| KUP-HAK-KT  | 13                   | 18                | 13                 |
| CNGC        | 27                   | 21                | 20                 |
| TPK         | 4                    | 7                 | 6                  |
| PPa         | 7                    | 6                 | 6                  |
| AHA         | 10                   | 10                | 11                 |
| ACA         | 16                   | 12                | 11                 |
| ECA         | 3                    | 4                 | 4                  |
| CHX         | 28                   | 28                | 29                 |
| CAX         | 5                    | 5                 | 6                  |
| AVP         | 4                    | 3                 | 2                  |
| VHA.a       | 3                    | 3                 | 3                  |
| VHA.c'      | 4                    | 4                 | 5                  |
| VHA.c''     | 1                    | 2                 | 2                  |
| VHA.d       | 2                    | 2                 | 2                  |
| VHA.e       | 1                    | 2                 | 2                  |
| VHA-A       | 1                    | 1                 | 1                  |
| VHA-B       | 3                    | 4                 | 3                  |
| VHA-C       | 1                    | 1                 | 1                  |
| VHA-D       | 1                    | 1                 | 1                  |
| VHA-E       | 3                    | 4                 | 3                  |
| VHA-F       | 1                    | 1                 | 1                  |
| VHA-G       | 3                    | 3                 | 3                  |
| VHA-H       | 1                    | 1                 | 1                  |
| GLR         | 12                   | 14                | 20                 |
| CCC         | 1                    | 1                 | 1                  |
| ATBGL       | 49                   | 39                | 46                 |
| CBL         | 9                    | 10                | 10                 |
| CIPK        | 30                   | 28                | 25                 |
| CDPK        | 37                   | 36                | 34                 |

**Table S8. Species distribution analysis of wax biosynthesis gene families.**

| Gene Family        | No. of genes         |                   |                    |
|--------------------|----------------------|-------------------|--------------------|
|                    | <i>T. salsuginea</i> | <i>T. parvula</i> | <i>A. thaliana</i> |
| ACC                | 4                    | 2                 | 2                  |
| FATB               | 1                    | 1                 | 1                  |
| LACS               | 11                   | 9                 | 9                  |
| KCS                | 22                   | 24                | 21                 |
| KCR                | 3                    | 2                 | 2                  |
| HCD                | 1                    | 1                 | 1                  |
| ECR                | 1                    | 1                 | 1                  |
| FAR                | 9                    | 10                | 8                  |
| WS/DGAT            | 11                   | 16                | 11                 |
| MAH1/CYP96A15      | 2                    | 2                 | 1                  |
| WBC11              | 1                    | 1                 | 1                  |
| CER5/WBC12         | 1                    | 2                 | 1                  |
| CER1/CER-like      | 3                    | 3                 | 4                  |
| CER2               | 1                    | 0                 | 1                  |
| CER3/WAX2/YRE/FLP1 | 1                    | 1                 | 1                  |
| CER7               | 1                    | 1                 | 1                  |
| WIN1/SHN1          | 1                    | 0                 | 1                  |
| Total              | 74                   | 76                | 67                 |

**Table S9. Species distribution analysis of ABA biosynthesis and ABA signaling related gene families.**

| Gene Family | No. of genes         |                   |                    |
|-------------|----------------------|-------------------|--------------------|
|             | <i>T. salsuginea</i> | <i>T. parvula</i> | <i>A. thaliana</i> |
| ZEP         | 2                    | 1                 | 1                  |
| AAO         | 7                    | 4                 | 4                  |
| ABA3        | 1                    | 1                 | 1                  |
| NCED        | 7                    | 7                 | 7                  |
| CYP707A     | 5                    | 4                 | 4                  |
| SDIR1       | 1                    | 1                 | 1                  |
| PP2C        | 75                   | 74                | 74                 |
| SNRK2       | 9                    | 11                | 10                 |
| ABF         | 4                    | 4                 | 4                  |
| ABI5        | 1                    | 1                 | 1                  |
| AFP         | 4                    | 4                 | 4                  |

**Table S10. Species distribution analysis of other gene families related to salinity, drought and cold stress response or tolerance.**

| Gene Family | No. of genes         |                   |                    |
|-------------|----------------------|-------------------|--------------------|
|             | <i>T. salsuginea</i> | <i>T. parvula</i> | <i>A. thaliana</i> |
| PLD         | 15                   | 11                | 12                 |
| P5CDH       | 1                    | 1                 | 1                  |
| P5CS        | 2                    | 2                 | 2                  |
| PDH         | 2                    | 2                 | 2                  |
| DREB        | 56                   | 55                | 56                 |
| ERF         | 59                   | 67                | 62                 |
| MAPK        | 18                   | 19                | 20                 |
| MAPKK       | 10                   | 11                | 10                 |
| MEKK        | 20                   | 20                | 21                 |
| ZIK         | 11                   | 11                | 11                 |
| Raf         | 45                   | 50                | 48                 |
| AHK1        | 1                    | 2                 | 1                  |
| SKB1        | 3                    | 2                 | 1                  |
| SIZ1        | 2                    | 2                 | 1                  |
| LEA         | 42                   | 41                | 40                 |
| OTS         | 2                    | 3                 | 2                  |
| ATSAT32     | 6                    | 1                 | 1                  |
